# Supplementary material for: Construction of a crossed-layer-structure MoS2/g-C3N4heterojunction with enhanced photocatalytic performance
Source: Royal Society of Chemistry journal article supplement (doi:10.1039/c6ra26925g), 2017-01-01
Supplement: c6ra26925g1.pdf [file c6ra26925g1.pdf]

**Electronic Supplementary Material (ESI) for RSC Advances.**  
**This journal is ©The Royal Society of Chemistry 2016**

## **Supporting Information**

### **Construction of a crossed-layer-structure MoS<sub>2</sub>/g-C<sub>3</sub>N<sub>4</sub> heterojunction with Enhanced photocatalytic performance**

Youzhi Cao<sup>a</sup>, Qiao Li<sup>a</sup>, Wei Wang<sup>\*a, b</sup>

<sup>a</sup> School of Chemistry and Chemical Engineering, Shihezi University, Shihezi, Xinjiang, China, 832003

<sup>b</sup>Key Laboratory for Green Processing of Chemical Engineering of Xinjiang Bingtuan, Shihezi University, Shihezi, Xinjiang, China, 832003

[\\*wangwei\\_group@sina.com](mailto:wangwei_group@sina.com)

\*To whom all correspondence should be addressed.

### Visible light activity experiments

The activity of the photocatalysts also was evaluated via the photocatalytic degradation of phenol under visible light irradiation. In a typical experiment, 0.05 g photocatalyst was suspended in 100 mL 10 mg/L phenol solution. The suspension was first dispersed by sonication for 30 min and stirred for 30 min in the dark to obtain adsorption–desorption equilibrium between the phenol and the photocatalyst. The suspension was then stirred and irradiated under a 300 W Xe lamp ( $\lambda > 400$  nm). During the irradiation process, about 3 mL of suspension was taken from the reaction cell every 30 min and centrifuged to remove the photocatalyst. The absorbance of the phenol solution in degradation was detected on HPLC (waters 2695 with C-18 column).

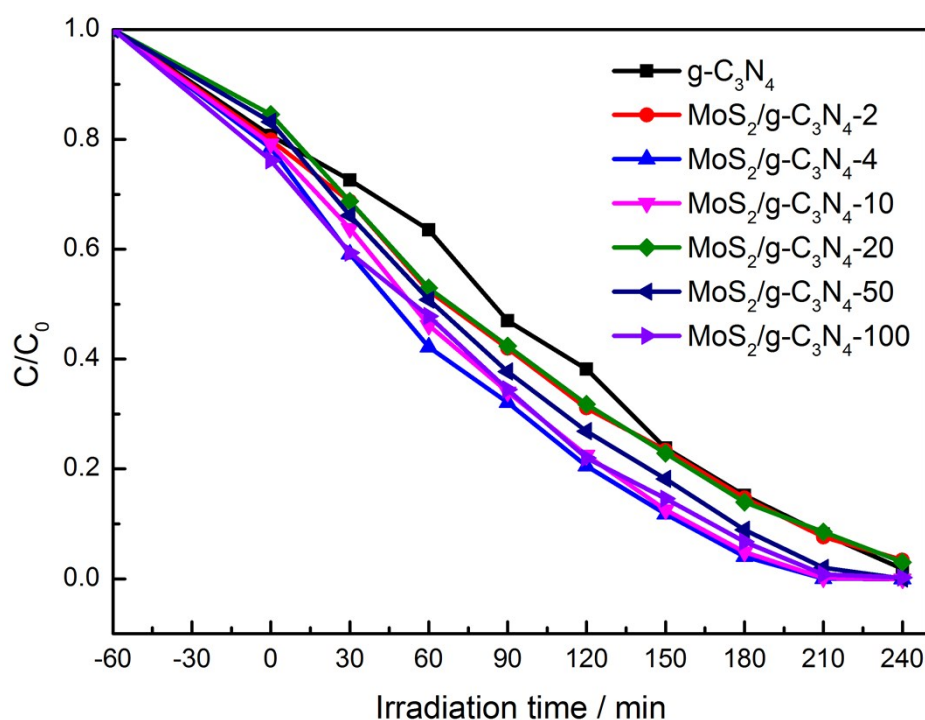

Fig. S1 Photocatalytic degradation of phenol by  $g-C_3N_4$  and  $MoS_2/g-C_3N_4$  samples under visible light ( $\lambda > 400$  nm, 300W Xe lamp).

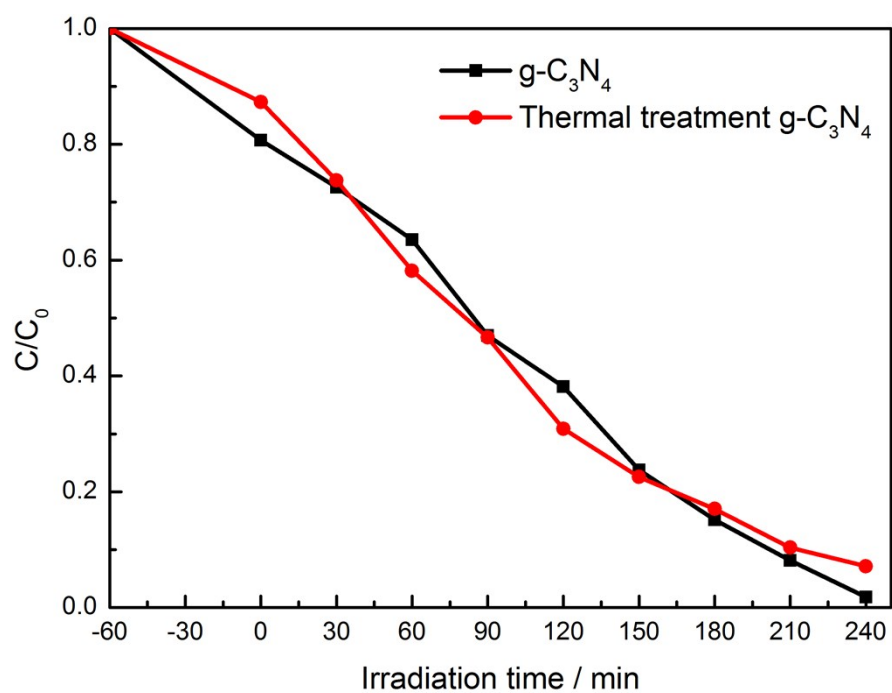

Fig. S2 Photocatalytic degradation of phenol by  $g-C_3N_4$  and thermal treatment  $g-C_3N_4$  under visible light ( $\lambda > 400$  nm, 300W Xe lamp).
